# Supplementary material for: Immunogenicity of a DNA-Based Sindbis Replicon Expressing Crimean–Congo Hemorrhagic Fever Virus Nucleoprotein
Source: MDPI journal article supplement (doi:10.3390/vaccines9121491), 2021-12-16
Supplement: s1 [file s1]

## Supplementary Materials

**Table S1:** RT-qPCR viral load results following the transfection of pSinCCHF-52S in BHK-21 cells. Samples were analyzed in duplicate.

| Time after electroporation | Ct value       | Estimated RNA copy number | Average RNA copy number |
|----------------------------|----------------|---------------------------|-------------------------|
| 4 hrs<br>4 hrs             | 28.52<br>28.68 | *NE                       | *NE                     |
| 8 hrs<br>8 hrs             | 24.31<br>24.21 | 4.09 E3<br>4.31 E3        | 4.23 E3                 |
| 12 hrs<br>12 hrs           | 22.86<br>23.01 | 1.06 E4<br>9.6 E3         | 9.65 E3                 |
| 24 hrs<br>24 hrs           | 22.01<br>21.96 | 1.85 E4<br>1.91 E4        | 1.88 E4                 |
| 48 hrs<br>48 hrs           | 22.98<br>23.16 | 9.78 E3<br>8.7 E3         | 9.24 E3                 |

\*NE – CCHFV RNA copy numbers not estimated

**Table S2:** Spearman Rank Order Correlations. MD pairwise deleted. Correlations in bold are significant at  $p < 0.001$

| Variable                | Anti-52S<br>IgG1 | Anti-52S<br>IgG2a | Anti-52S<br>IgG2b | Anti-52S<br>IgG2a/IgG1 | Anti-52S<br>IgG2a/IgG2b | IFN- $\gamma$   | IL-2            | TNF- $\alpha$   | IL-10     | IL-6            |
|-------------------------|------------------|-------------------|-------------------|------------------------|-------------------------|-----------------|-----------------|-----------------|-----------|-----------------|
| Anti-52S IgG1           | 1.000000         | <b>0.927173</b>   | <b>0.993399</b>   | -0.750000              | -0.883883               | 0.906539        | 0.906539        | <b>0.974679</b> | 0.468692  | <b>0.951190</b> |
| Anti-52S IgG2a          | <b>0.927173</b>  | 1.000000          | <b>0.933333</b>   | 0.000000               | -0.304290               | <b>0.950586</b> | <b>0.950586</b> | <b>0.968246</b> | 0.363419  | 0.818923        |
| Anti-52S IgG2b          | <b>0.993399</b>  | <b>0.933333</b>   | 1.000000          | -0.645497              | -0.912871               | 0.887214        | 0.887214        | <b>0.968246</b> | 0.446304  | <b>0.944911</b> |
| Anti-52S<br>IgG2a/IgG1  | -0.750000        | 0.000000          | -0.645497         | 1.000000               | 0.824958                | -0.223607       | -0.223607       | -0.447214       | -0.223607 | -0.894427       |
| Anti-52S<br>IgG2a/IgG2b | -0.883883        | -0.304290         | -0.912871         | 0.824958               | 1.000000                | -0.263523       | -0.263523       | -0.632456       | 0.263523  | -0.948683       |
| IFN- $\gamma$           | 0.906539         | <b>0.950586</b>   | 0.887214          | -0.223607              | -0.263523               | 1.000000        | 0.921687        | <b>0.932673</b> | 0.448493  | 0.790433        |
| IL-2                    | 0.906539         | <b>0.950586</b>   | 0.887214          | -0.223607              | -0.263523               | 0.921687        | 1.000000        | <b>0.957217</b> | 0.375764  | 0.778457        |
| TNF- $\alpha$           | <b>0.974679</b>  | <b>0.968246</b>   | <b>0.968246</b>   | -0.447214              | -0.632456               | <b>0.932673</b> | <b>0.957217</b> | 1.000000        | 0.395092  | 0.902708        |
| IL-10                   | 0.468692         | 0.363419          | 0.446304          | -0.223607              | 0.263523                | 0.448493        | 0.375764        | 0.395092        | 1.000000  | 0.542208        |
| IL-6                    | <b>0.951190</b>  | 0.818923          | <b>0.944911</b>   | -0.894427              | -0.948683               | 0.790433        | 0.778457        | 0.902708        | 0.542208  | 1.000000        |

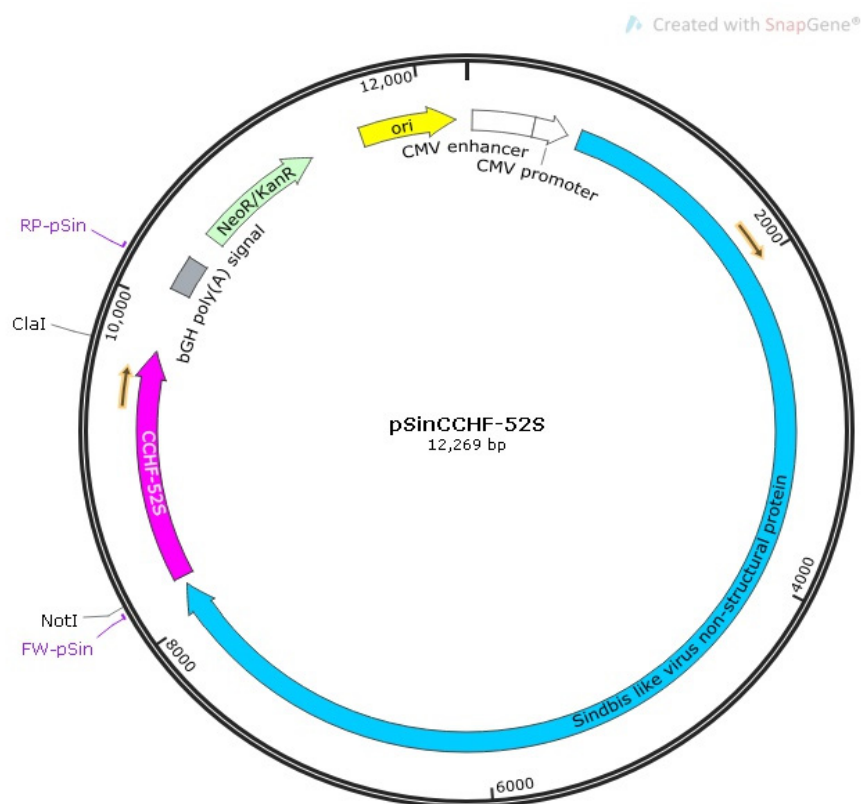

**Figure S1.** Preparation of recombinant plasmids. Schematic representation of pSinCCHF-52S.

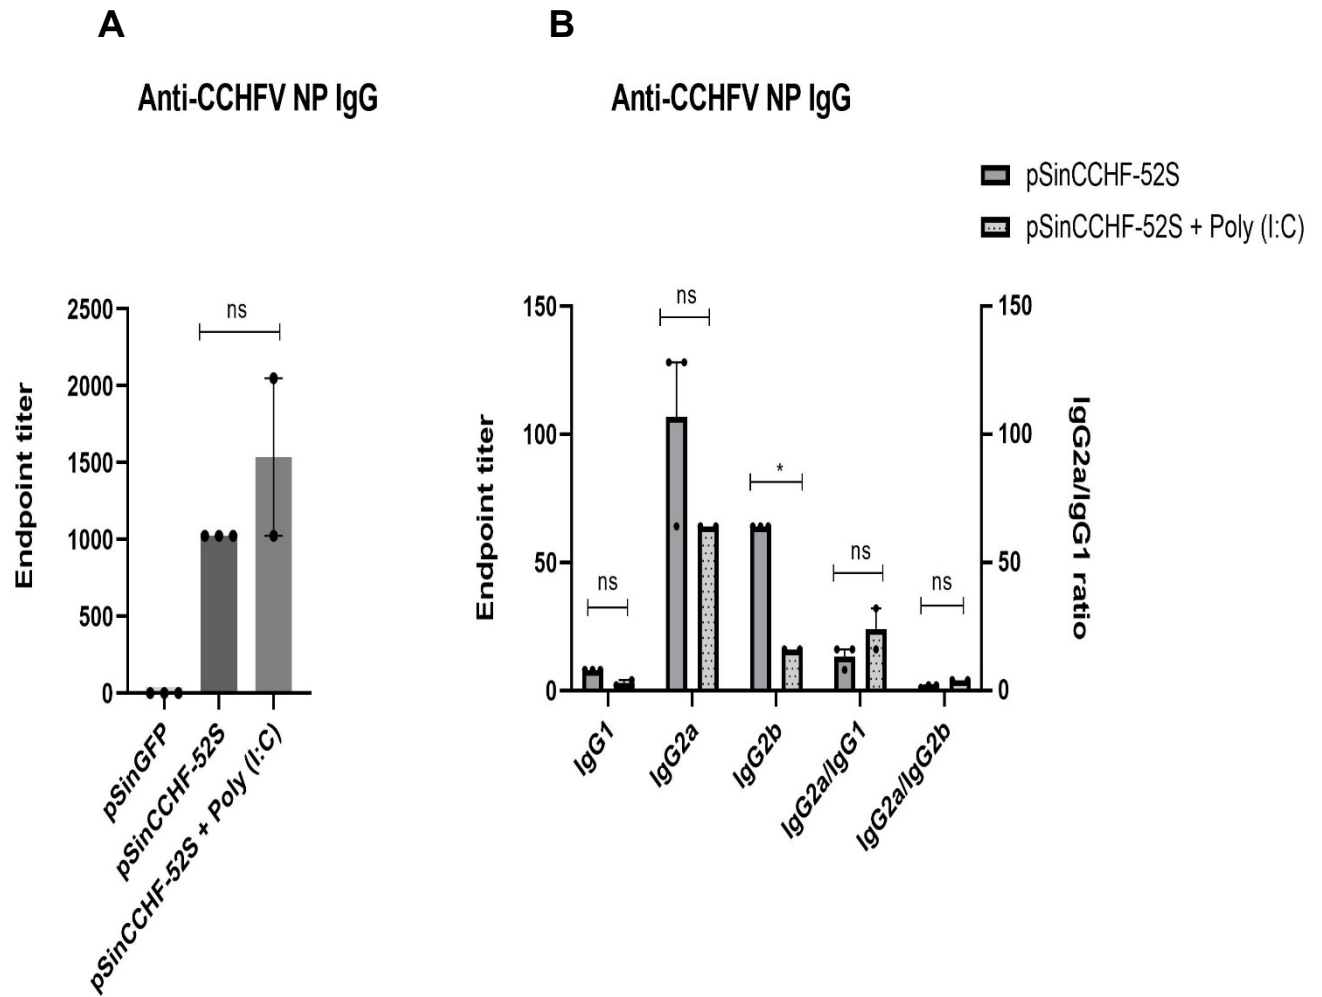

**Figure S2.** Antibody responses induced by immunization with pSinCCHF-52S with and without Poly (I:C). **(A)** Total anti-CCHFV NP endpoint titer **(B)** Anti-CCHFV NP IgG isotypes endpoint titer. Mice (NIH; n = 3/group) were immunized three times intramuscularly with the prepared pSinCCHF-52S construct expressing CCHFV nucleoprotein with and without Poly (I:C). Serum anti-CCHFV NP IgG subtypes were analyzed using an indirect immunofluorescent assay. Data are expressed as the mean for three mice (pSinCCHF-52S) and two mice for pSinCCHF-52S+Poly (I:C) and the standard error of the mean. \* Statistical analysis performed using the F test.

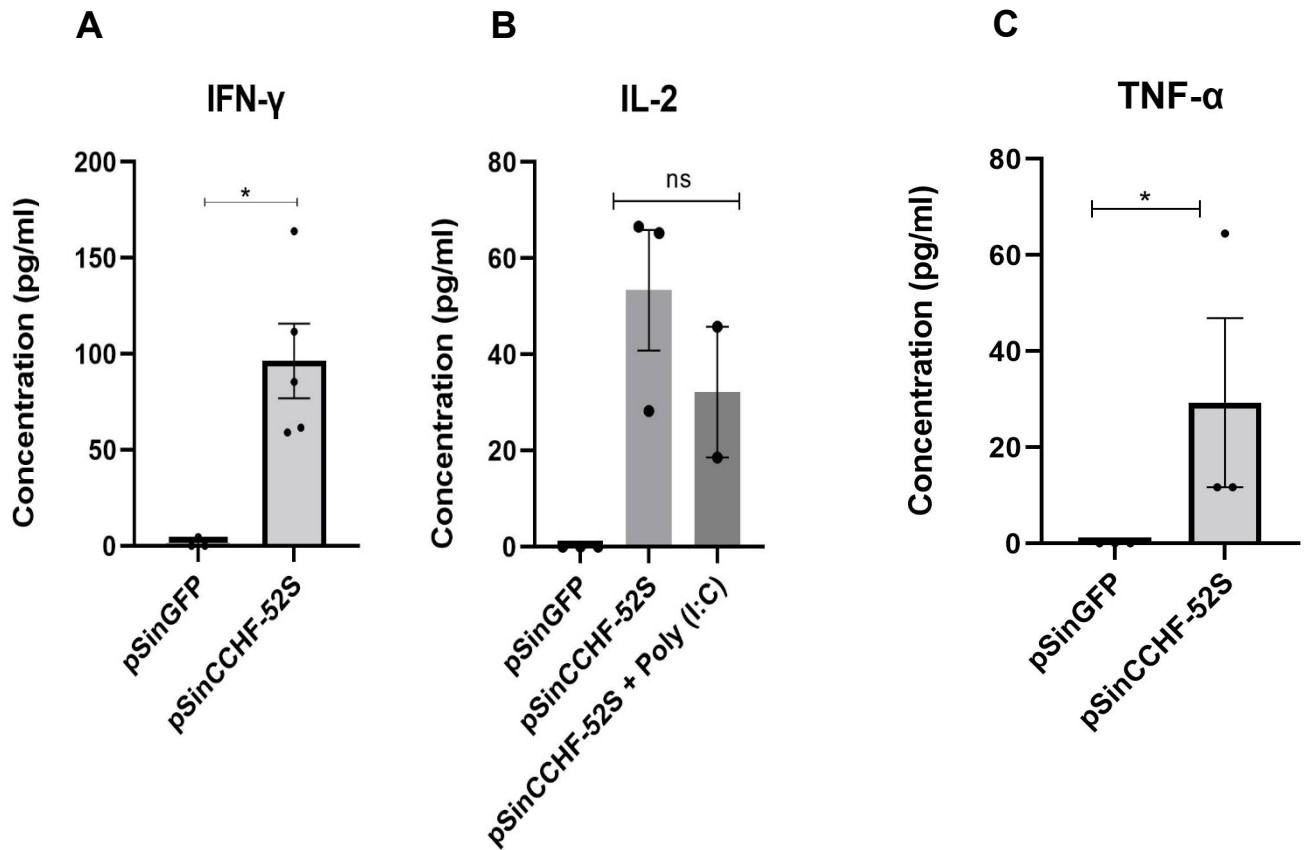

**Figure S3.** Cytokine profiling by ELISA from splenocytes harvested from NIH mice after immunization with pSinCCHF-52S independently ( $n = 3$ ) or with adjuvant poly (I:C) ( $n = 2$ ). (A) IFN- $\gamma$ , (B) IL-2, (C) TNF- $\alpha$ . Data are expressed as the mean for three mice (except for pSinCCHF-52S + Poly (I:C),  $n = 2$ /group) and the standard error of the mean. \*  $p < 0.05$ .

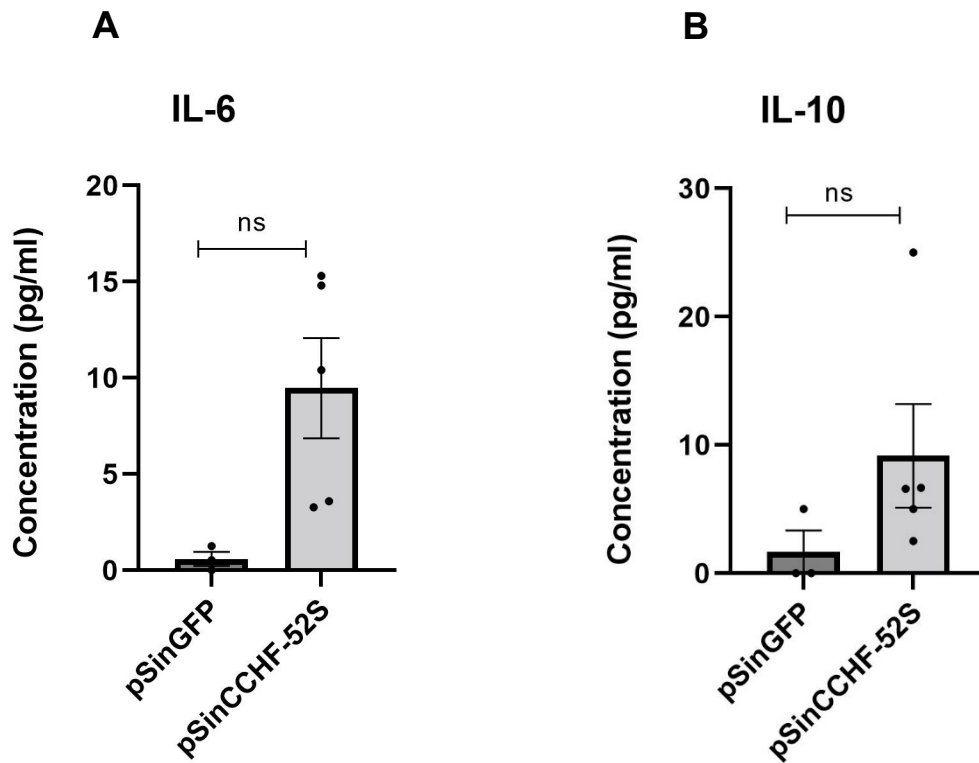

**Figure S4.** Cytokine profiling by ELISA from splenocytes harvested from NIH mice (n = 5/group) after immunization with pSinCCHF-52S independently or with adjuvant poly (I:C). (A) IL-6, (B) IL-10. Data are expressed as the mean for three mice (except for pSinGFP, n = 3/group) and the standard error of the mean. \* p < 0.05.

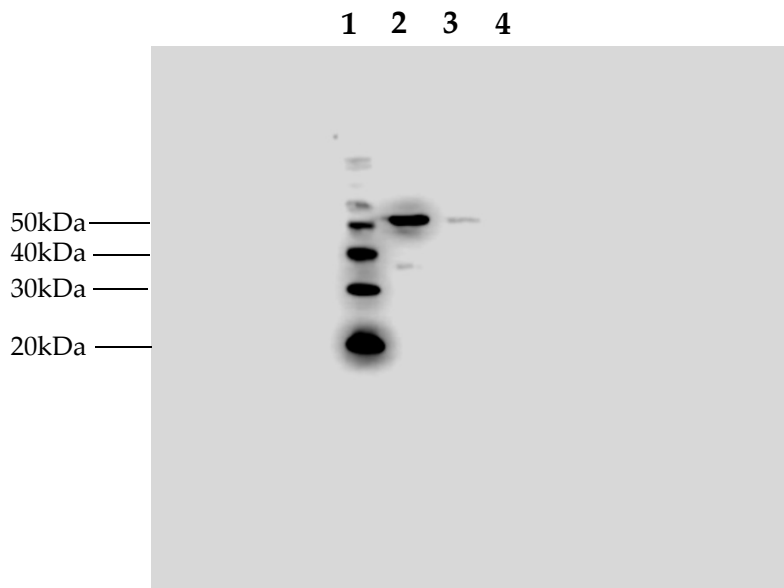

**Figure S5:** Western blot analysis of CCHFV NP. From left to right; Lane 1: MagicMark XP Western Protein Standard, lane 2 BHK-21 cells transfected with pSinCCHF-52S, Lane 3 BHK-21 cells transfected with pSinCCHF-31S (Replicon kinetics and immunogenicity data not reported in this study), Lane 4 Mock-transfected BHK-21 cells.
